# Supplementary material for: A Stable Biotin-Streptavidin Surface Enables Multiplex, Label-Free Protein Detection by Aptamer and Aptamer-Protein Arrays Using Arrayed Imaging Reflectometry
Source: MDPI journal article supplement (doi:10.3390/s20205745), 2020-10-10
Supplement: s1 [file s1]

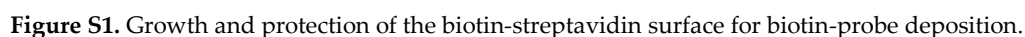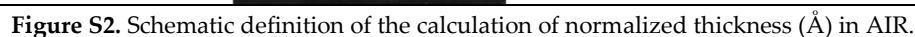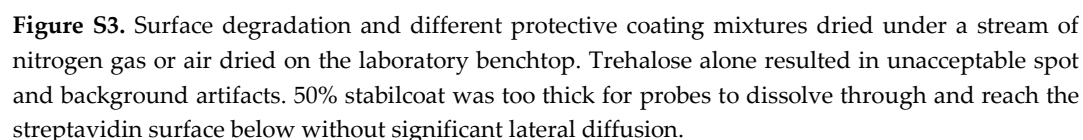

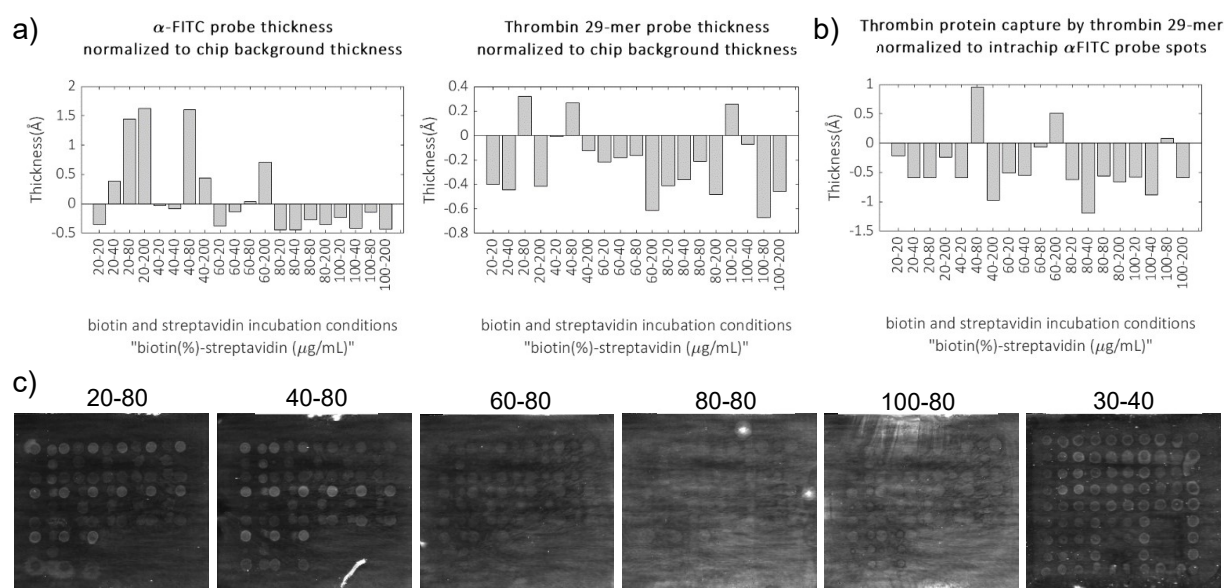

**Figure S4.** Arrays on chip surfaces containing different ratios of biotinylated and non-biotinylated linkers and streptavidin concentrations. The first number indicates percentage of biotinylated linker attached to the substrate surface. The second number indicates concentration of streptavidin incubated with the biotinylated surface ( $\mu\text{g/mL}$ ). Higher concentrations of biotin produced thicker streptavidin layers as measured by AIR (for example, 1422.3 Å for 100–80 vs. 1419.7 Å for 20–80). Initial measurements of probe deposition thickness via AIR indicated that 20% or 40% biotin linker and 80  $\mu\text{g/mL}$  streptavidin was ideal and led to greatest amount of probe deposited compared to the background (a), which is also seen in the AIR images (all taken with a 500 ms exposure time) (c). Measurements of target capture via AIR indicated that the 40% biotin linker with 80  $\mu\text{g/mL}$  streptavidin condition led to the greatest amount of target thrombin captured by aptamer (b). Probe deposition from later experiments using a 30% biotin linker and 40  $\mu\text{g/mL}$  streptavidin was acceptable and comparable to the 20% biotin : 80% methyl and 40% biotin : 60% methyl conditions (c).

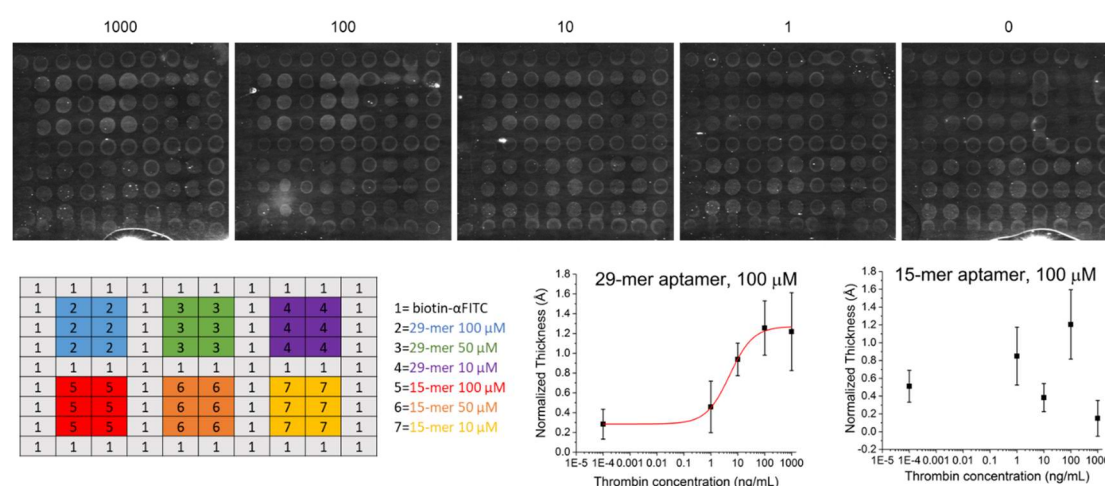

**Figure S5.** Detection of thrombin protein using two different aptamer probes (29-mer and 15-mer). Representative array images of chips incubated in thrombin protein in concentrations varying from 0 (control) to 1000 ng/mL. Thicknesses are measured by AIR and normalized to the biotin- $\alpha$ FITC intra-chip control spots, plotted, and fit with a nonparametric logistic curve. Error bars are the standard deviation of replicate probe spots over two chips ( $n = 12$ ).

a)

|   |   |   |   |   |   |   |   |   |   |
|---|---|---|---|---|---|---|---|---|---|
| 1 | 2 | 2 | 1 | 2 | 2 | 1 | 2 | 2 | 1 |
| 2 | 3 | 3 | 2 | 4 | 4 | 2 | 5 | 5 | 2 |
| 2 | 3 | 3 | 2 | 4 | 4 | 2 | 5 | 5 | 2 |
| 1 | 3 | 3 | 1 | 4 | 4 | 1 | 5 | 5 | 1 |
| 2 | 2 | 2 | 2 | 2 | 2 | 2 | 2 | 2 | 2 |
| 1 | 6 | 6 | 1 | 7 | 7 | 1 | 8 | 8 | 1 |
| 2 | 6 | 6 | 2 | 7 | 7 | 2 | 8 | 8 | 2 |
| 2 | 6 | 6 | 2 | 7 | 7 | 2 | 8 | 8 | 2 |
| 1 | 2 | 2 | 1 | 2 | 2 | 1 | 2 | 2 | 1 |

1=biotin-BSA  
 2= biotinPNIPAM  
 3=TGFβ1 aptamer 10 μM  
 4=TGFβ1 aptamer 50 μM  
 5=TGFβ1 aptamer 100 μM  
 6=Thrombin 29-mer aptamer 10 μM  
 7=Thrombin 29-mer aptamer 50 μM  
 8=Thrombin 29-mer aptamer 100 μM

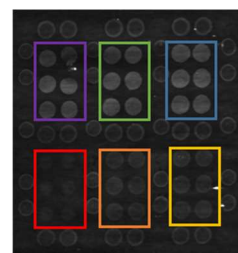

b)

|   |   |   |   |   |   |   |   |   |   |
|---|---|---|---|---|---|---|---|---|---|
| 1 | 1 | 1 | 1 | 1 | 1 | 1 | 1 | 1 | 1 |
| 1 | 2 | 2 | 2 | 1 | 3 | 3 | 3 | 1 | 1 |
| 1 | 2 | 2 | 2 | 1 | 3 | 3 | 3 | 1 | 1 |
| 1 | 1 | 1 | 1 | 1 | 1 | 1 | 1 | 1 | 1 |
| 1 | 4 | 4 | 4 | 1 | 5 | 5 | 5 | 1 | 1 |
| 1 | 4 | 4 | 4 | 1 | 5 | 5 | 5 | 1 | 1 |
| 1 | 1 | 1 | 1 | 1 | 1 | 1 | 1 | 1 | 1 |

1=biotin-αIFNγ  
 2=TGFβ1 aptamer 100 μM  
 3=TGFβ1 aptamer 50 μM  
 4=RhFcy RIIIA/CD16a 600 μg/mL  
 5=RhFcy RIIIA/CD16a 300 μg/mL

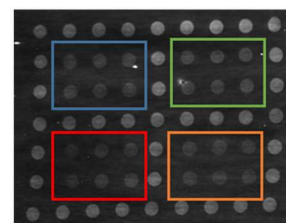

**Figure S6.** Probe layout for AIR images in figures 4 and 5 (a), and figure 6 (b).

**Table S1.** Values used to calculate p-values (all  $p < 0.00001$ ) for significant difference in resulting LOD of the assay according to probe deposition concentration.

|                 | probe concentrations | t-statistic | degrees of freedom |
|-----------------|----------------------|-------------|--------------------|
| TGFβ1           | 10 μM vs 50 μM       | 182.6       | 215.4              |
|                 | 10 μM vs 100 μM      | 484.8       | 229.7              |
|                 | 50 μM vs 100 μM      | 363.2       | 212.0              |
| Thrombin 29-mer | 50 μM vs 100 μM      | 23.7        | 225.1              |
